# Supplementary material for: Real-World Data on Treatment Management and Outcomes of Patients with Newly Diagnosed Advanced Epithelial Ovarian Cancer in Greece (The EpOCa Study)
Source: MDPI journal article supplement (doi:10.3390/curroncol28060440), 2021-12-10
Supplement: s1 [file s1]

# Real-World Data on Treatment Management and Outcomes of Patients with Newly Diagnosed Advanced Epithelial Ovarian Cancer in Greece (the EpOCa Study)

Michalis Liontos, Eleni Timotheadou, Emmanuel I. Papadopoulos, Zafeiris Zafeiriou, Dimitra Ioanna Lampropoulou, Gerasimos Aravantinos, Dimitrios Mavroudis, Christos Christodoulou, Adamantia Nikolaidi, Alvertos Somarakis, Christos Papadimitriou, Christos Papandreou and Aristotelis Bamias

**Table S1.** Summary of data collected for surgical management and systemic therapy of recruited patients.

|                                                                       | Surgical procedures                 |                                |                                       |                                   |                               |                               |                              |
|-----------------------------------------------------------------------|-------------------------------------|--------------------------------|---------------------------------------|-----------------------------------|-------------------------------|-------------------------------|------------------------------|
|                                                                       | Before 1 <sup>st</sup> PD (N = 139) |                                |                                       | After 1 <sup>st</sup> PD (N = 14) |                               |                               |                              |
|                                                                       | Primary debulking                   | Interval debulking             | Debulking Surgery following NACT only | Secondary debulking               |                               |                               |                              |
|                                                                       |                                     |                                |                                       | At 1 <sup>st</sup> PD             | At 2 <sup>nd</sup> PD         |                               |                              |
|                                                                       |                                     |                                |                                       | n <sub>pt</sub> (%)               | n <sub>pt</sub> (%)           |                               |                              |
| <b>Surgical outcomes</b>                                              | 81 (58.3%)                          | 53 (38.1%)                     | 5 (3.6%)                              | 12 (85.7%)                        | 2 (14.3%)                     |                               |                              |
| Complete resection of all macroscopic visible disease                 | 18 (22.2%)                          | 14 (26.4%)                     | 1 (20.40%)                            | 1 (8.3%)                          | 1 (50.0%)                     |                               |                              |
| Optimal but visible residual disease (0.1-1.0 cm in maximal diameter) | 7 (8.7%)                            | 4 (7.6%)                       | -                                     | -                                 | -                             |                               |                              |
| Suboptimal debulking (residual disease >1.0cm)                        | 7 (8.7%)                            | 5 (9.4%)                       | -                                     | 1 (8.3%)                          | -                             |                               |                              |
| Unknown                                                               | 49 (60.4%)                          | 30 (56.6%)                     | 4 (80.0%)                             | 10 (83.3%)                        | 1 (50.0%)                     |                               |                              |
| Systemic therapy                                                      |                                     |                                |                                       |                                   |                               |                               |                              |
|                                                                       | 1 <sup>st</sup> line (N = 154)      | 2 <sup>nd</sup> line (N = 109) | 3 <sup>rd</sup> line (N = 74)         | 4 <sup>th</sup> line (N = 48)     | 5 <sup>th</sup> line (N = 31) | 6 <sup>th</sup> line (N = 15) | 7 <sup>th</sup> line (N = 3) |
|                                                                       | n <sub>pt</sub> (%)                 | n <sub>pt</sub> (%)            | n <sub>pt</sub> (%)                   | n <sub>pt</sub> (%)               | n <sub>pt</sub> (%)           | n <sub>pt</sub> (%)           | n <sub>pt</sub> (%)          |
| Platinum-based CT                                                     | 81 (52.7%)                          | 49 (45.0%)                     | 33 (44.6%)                            | 11 (22.9%)                        | 7 (22.6%)                     | 4 (26.7%)                     | 1 (33.3%)                    |
| Platinum-based CT + angiogenesis inhibitor                            | 73 (47.3%)                          | 9 (8.3%)                       | 1 (1.4%)                              | -                                 | -                             | -                             | -                            |

|                                                |   |            |            |            |            |           |           |
|------------------------------------------------|---|------------|------------|------------|------------|-----------|-----------|
| Platinum-based CT + PARP inhibitor             | - | 9 (8.3%)   | 1 (1.4%)   | 1 (2.1%)   | -          | 1 (6.7%)  | -         |
| Non-platinum-based CT                          | - | 31 (28.4%) | 35 (47.2%) | 33 (68.7%) | 22 (71.0%) | 8 (53.3%) | 1 (33.3%) |
| Non-platinum-based CT + angiogenesis inhibitor | - | 4 (3.7%)   | 2 (2.7%)   | 2 (4.2%)   | 1 (3.2%)   | -         | -         |
| Other*                                         | - | 7 (6.3%)   | 2 (2.7%)   | 1 (2.1%)   | 1 (3.2%)   | 2 (13.3%) | 1 (33.3%) |

CT: chemotherapy; N: total number of patients; n<sub>pt</sub>: number of patients per subgroup; NACT: neo-adjuvant chemotherapy; PD: progression of disease; PARP: poly (ADP-ribose) polymerase.\*In the 2nd line, 4 patients received platinum-based chemotherapy + angiogenesis inhibitor + PARP inhibitor, 1 patient received platinum compound + antiestrogen therapy, 1 patient received antiestrogen therapy, and 1 patient was treated with an aromatase inhibitor; in the 3rd line, 1 patient received non-platinum-based chemotherapy + PARP inhibitor and 1 patient was treated with PARP inhibitor monotherapy; in the 4th line, 1 patient received progesterone; in the 5th line, 1 patient received platinum-based chemotherapy + angiogenesis inhibitor + PARP inhibitor; in the 6th line, 1 patient received antiestrogen therapy and 1 patient was treated with angiogenesis inhibitor monotherapy; in the 7th line, 1 patient received aromatase inhibitor.

**Table S2.** Univariable and multivariable logistic regression analysis for the association of first-line treatment (platinum-based chemotherapy + bevacizumab versus platinum-based chemotherapy only) with factors of interest.

| Univariable logistic regression analysis                                                                      |                        |                 |                     |      |             |             |         |
|---------------------------------------------------------------------------------------------------------------|------------------------|-----------------|---------------------|------|-------------|-------------|---------|
| Eligible patients receiving Platinum-based CT + bevacizumab and platinum-based CT first-line treatment: N=148 |                        |                 |                     |      |             |             |         |
| Parameter                                                                                                     | Category vs. reference | n <sub>pt</sub> | n <sub>GroupB</sub> | OR   | 95% CI      |             | p-value |
|                                                                                                               |                        |                 |                     |      | Lower limit | Upper limit |         |
| Age at aEOC diagnosis (N=148)                                                                                 | <65 vs ≥ 65 years      | 86 vs 62        | 51 vs 20            | 3.06 | 1.54        | 6.07        | 0.001   |
| FIGO stage at aEOC diagnosis (N = 148)                                                                        | III vs IV              | 110 vs 38       | 59 vs 12            | 2.51 | 1.15        | 5.47        | 0.021   |
| Tumor grade at aEOC diagnosis (N = 127)                                                                       | G3 vs G1/G2            | 102 vs 25       | 51 vs 8             | 2.12 | 0.84        | 5.36        | 0.111   |
| Tumor histology at aEOC diagnosis (N = 126)                                                                   | Serous vs Non-serous   | 106 vs 20       | 57 vs 6             | 2.71 | 0.97        | 7.60        | 0.057   |
| BRCA1/BRCA2 status between aEOC diagnosis and first disease progression (N = 35)                              | Positive vs Negative   | 13 vs 22        | 9 vs 18             | 0.50 | 0.10        | 2.48        | 0.396   |
| ECOG PS at first-line treatment onset (N = 83)                                                                | ≥1 vs 0                | 23 vs 60        | 2 vs 32             | 0.08 | 0.02        | 0.39        | 0.002   |
| Presence of ascites at first-line treatment onset (N=116)                                                     | Yes vs No              | 46 vs 70        | 19 vs 32            | 0.84 | 0.39        | 1.77        | 0.640   |
| Presence of symptoms at first-line treatment onset (N = 102)                                                  | Yes vs No              | 30 vs 72        | 14 vs 32            | 1.09 | 0.47        | 2.57        | 0.837   |

|                                                                                                             |           |           |          |      |      |      |       |
|-------------------------------------------------------------------------------------------------------------|-----------|-----------|----------|------|------|------|-------|
| <b>Presence of comorbidities at first-line treatment onset (N = 137)</b>                                    | Yes vs No | 84 vs 53  | 34 vs 28 | 0.61 | 0.30 | 1.21 | 0.158 |
| <b>At least one site of disease localization at first-line treatment onset (N = 127)</b>                    | Yes vs No | 67 vs 60  | 27 vs 34 | 0.52 | 0.25 | 1.05 | 0.067 |
| <b>Lymph nodes metastases at first-line treatment onset (N = 127)</b>                                       | Yes vs No | 22 vs 105 | 11 vs 50 | 1.10 | 0.44 | 2.76 | 0.839 |
| <b>Peritoneum metastasis at first-line treatment onset (N = 127)</b>                                        | Yes vs No | 35 vs 92  | 16 vs 45 | 0.88 | 0.40 | 1.92 | 0.748 |
| <b>Malignant pleural effusion/lung/pleura metastasis at first-line treatment onset (N = 127)</b>            | Yes vs No | 22 vs 105 | 4 vs 57  | 0.19 | 0.06 | 0.59 | 0.004 |
| <b>Extra-abdominopelvic metastases at first-line treatment onset (N = 127)</b>                              | Yes vs No | 25 vs 102 | 6 vs 55  | 0.27 | 0.10 | 0.73 | 0.010 |
| <b>Residual disease status following cytoreductive surgery prior to first-line treatment onset (N = 54)</b> | Yes vs No | 23 vs 31  | 7 vs 18  | 0.32 | 0.10 | 0.99 | 0.047 |

#### Multivariable logistic regression analysis\*\*

Eligible patients receiving Platinum-based CT + bevacizumab and platinum-based CT first-line treatment: N=148  
95% CI

| Parameter                                               | Category vs. reference | OR   | Lower limit | Upper limit | p-value |
|---------------------------------------------------------|------------------------|------|-------------|-------------|---------|
| Number of observations used in model: N = 137           |                        |      |             |             |         |
| FIGO stage aEOC diagnosis                               | III vs IV              | 4.01 | 1.56        | 10.28       | 0.004   |
| Presence of comorbidities at first-line treatment onset | Yes vs No              | 0.54 | 0.26        | 1.11        | 0.095   |

aEOC: advanced epithelial ovarian cancer; CI: confidence interval; CT: chemotherapy; ECOG PS: eastern cooperative oncology group performance status FIGO: International Federation of Gynecology and Obstetrics; N: total number of patients; n<sub>pt</sub>: number of patients per subgroup; n<sub>GroupB</sub>: number of patients per subgroup of Group B; OR: odds ratio. \*\*The modeled probability was 'Platinum-based CT + bevacizumab (Group B)' vs. 'Platinum-based CT (Group A)' first line treatment regimen. \*The following factors were included in the initial step of the stepwise procedure: age at aEOC diagnosis, FIGO stage at aEOC diagnosis, presence of comorbidities at first-line treatment onset. Factors examined in univariable analyses with a missing rate exceeding 10% were not included in the initial step of the stepwise procedure.

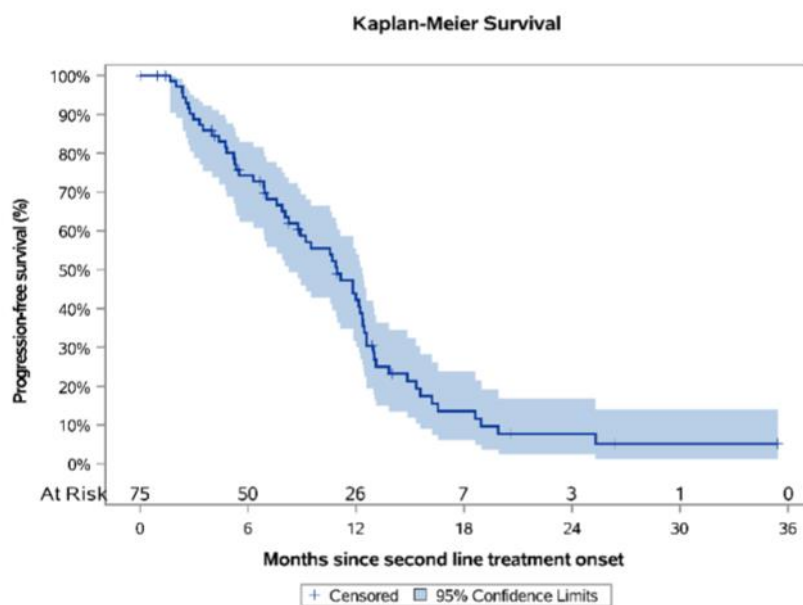

**Figure S1.** Kaplan-Meier progression-free survival curve of patients with platinum-sensitive relapse in the second-line setting.

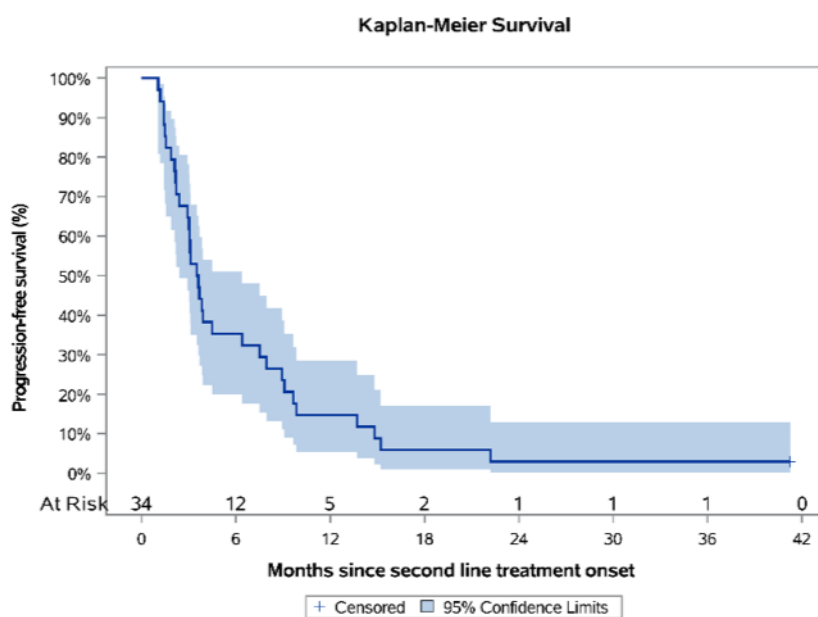

**Figure S2.** Kaplan-Meier progression-free survival curve of patients with platinum-resistant/refractory relapse in the second-line setting. .
